# Supplementary material for: A versatile isothermal amplification assay for the detection of leptospires from various sample types
Source: PeerJ. 2022 Mar 10;10:e12850. doi: 10.7717/peerj.12850 (PMC8918162; doi:10.7717/peerj.12850)
Supplement: Supplemental Information 9 [file peerj-10-12850-s009.xlsx]

## Sheet: Sheet1
	Admission					Discharge samples
	Blood		Urine			Blood		Urine
Sample ID	LAMP	PCR	LAMP	PCR		LAMP	PCR	LAMP	PCR		Indications:
1	+VE	+VE	+VE	+VE		-	-	-	-		+VE	Indicates positive for leptospiral DNA detection
2	+VE	+VE	+VE	+VE		-	-	-	-		-VE	Indicates negative for leptospiral DNA detection
3	+VE	+VE	+VE	+VE		-	-	-	-		-	Indicates no sample wwas collected
4	+VE	+VE	-VE	-VE		-	-	-	-
5	+VE	+VE	+VE	+VE		-	-	-	-
6	-VE	-VE	-VE	-VE		-VE	-VE	-	-
7	+VE	+VE	-VE	-VE		-	-	-	-
8	-VE	-VE	-VE	-VE		-VE	-VE	-VE	-VE
9	+VE	-VE	-VE	-VE		+VE	-VE	-VE	-VE
10	-VE	-VE	+VE	-VE		-	-	-	-
11	+VE	+VE	+VE	-VE		-	-	-	-
12	-VE	-VE	-VE	-VE		-	-	-	-
13	-VE	-VE	+VE	+VE		-	-	-	-
14	-VE	-VE	-VE	-VE		-VE	-VE	-VE	-VE
15	+VE	-VE	-VE	-VE		-	-	+VE	+VE
16	-VE	-VE	-VE	-VE		-VE	-VE	-	-
17	+VE	+VE	-VE	-VE		-	-	-	-
18	+VE	+VE	-VE	-VE		-VE	-VE	+VE	+VE
19	-VE	-VE	+VE	+VE		-	-	-	-
20	+VE	+VE	-VE	-VE		-	-	-	-
21	-VE	-VE	+VE	+VE		-VE	-VE	-	-
22	+VE	+VE	+VE	+VE		-	-	-	-
23	-VE	-VE	-VE	-VE		-	-	-	-
24	+VE	+VE	+VE	+VE		-	-	-	-
25	-VE	-VE	-VE	-VE		-	-	-	-
26	+VE	+VE	+VE	+VE		-	-	-	-
27	-VE	-VE	-VE	-VE		-	-	-	-
28	-VE	-VE	-VE	-VE		-VE	-VE	-VE	-VE
29	-VE	-VE	-VE	-VE		-VE	-VE	-VE	-VE
30	-VE	-VE	-VE	-VE		-VE	-VE	-VE	-VE
31	-VE	-VE	+VE	+VE		-	-	-	-
32	-VE	-VE	+VE	+VE		-	-	-	-
33	-VE	-VE	+VE	+VE		-	-	-	-
34	-	-	+VE	+VE		-	-	-	-
35	+VE	+VE	-	-		-	-	-	-
36	-VE	-VE	-	-		-	-	-	-
37	-VE	-VE	-	-		-VE	-VE	-	-
38	-VE	-VE	-	-		-VE	-VE	-	-
39	-VE	-VE	-	-		-	-	-	-
40	+VE	+VE	-	-		-	-	-	-
41	-VE	-VE	-	-		-	-	-	-
42	-VE	-VE	-	-		-VE	-VE	-	-
43	-VE	-VE	-	-		-	-	-	-
44	-VE	-VE	-	-		-VE	-VE	-	-
45	+VE	+VE	-	-		-	-	-	-
46	+VE	+VE	-	-		-	-	-	-
47	-VE	-VE	-	-		-	-	-	-
48	+VE	+VE	-	-		-	-	-	-
49	-VE	-VE	-	-		-	-	-	-
50	-VE	-VE	-	-		-	-	-	-
51	-VE	-VE	-	-		-	-	-	-
52	-VE	-VE	-	-		-VE	-VE	-	-
53	-VE	-VE	-	-		-	-	-	-
54	-VE	-VE	-	-		-	-	-	-
55	+VE	+VE	-	-		-	-	-	-
56	+VE	+VE	-	-		-	-	-	-
57	-VE	-VE	-	-		-	-	-	-
58	+VE	+VE	-	-		-	-	-	-
59	-VE	-VE	-	-		-	-	-	-
60	+VE	+VE	-	-		-	-	-	-
61	+VE	+VE	-	-		-	-	-	-
62	+VE	+VE	-	-		-	-	-	-
63	-VE	-VE	-	-		-	-	-	-
64	-VE	-VE	-	-		-	-	-	-
65	+VE	+VE	-	-		-	-	-	-
66	+VE	+VE	-	-		-	-	-	-
67	-VE	-VE	-	-		-	-	-	-
68	-VE	-VE	-	-		-	-	-	-
69	-VE	-VE	-	-		-	-	-	-
70	-VE	-VE	-	-		-	-	-	-
Total	69		34			15		8
