# Supplementary material for: A versatile isothermal amplification assay for the detection of leptospires from various sample types
Source: PeerJ. 2022 Mar 10;10:e12850. doi: 10.7717/peerj.12850 (PMC8918162; doi:10.7717/peerj.12850)
Supplement: Supplemental Information 10 [file peerj-10-12850-s010.xlsx]

## Sheet: Sheet2
	i) Blood positive, urine positive
	Sample ID	Blood	Urine		+VE	Indicates positive for leptospiral DNA detection
	1	+VE	+VE		-VE	Indicates negative for leptospiral DNA detection
	2	+VE	+VE
	3	+VE	+VE
	5	+VE	+VE
	11	+VE	+VE
	22	+VE	+VE
	24	+VE	+VE
	26	+VE	+VE
	ii) Blood negative,urine positive
	Sample ID	Blood	Urine
	10	-VE	+VE
	13	-VE	+VE
	19	-VE	+VE
	21	-VE	+VE
	31	-VE	+VE
	32	-VE	+VE
	33	-VE	+VE
	iii) Blood positive, urine negative
	Sample ID	Blood	Urine
	4	+VE	-VE
	7	+VE	-VE
	9	+VE	-VE
	15	+VE	-VE
	17	+VE	-VE
	18	+VE	-VE
	20	+VE	-VE
	iv) Blood negative, urine negative
	Sample ID	Blood	Urine
	6	-VE	-VE
	8	-VE	-VE
	12	-VE	-VE
	14	-VE	-VE
	16	-VE	-VE
	23	-VE	-VE
	25	-VE	-VE
	27	-VE	-VE
	28	-VE	-VE
	29	-VE	-VE
	30	-VE	-VE
