# Supplementary material for: A versatile isothermal amplification assay for the detection of leptospires from various sample types
Source: PeerJ. 2022 Mar 10;10:e12850. doi: 10.7717/peerj.12850 (PMC8918162; doi:10.7717/peerj.12850)
Supplement: Supplemental Information 11 [file peerj-10-12850-s011.xlsx]

## Sheet: Sheet1
1) Rat kidney sample from suspected leptosposis outbreak area
No.	Sample ID	LAMP	PCR
1	143	Negative	Negative
2	145	Negative	Negative
3	146	Negative	Negative			Positive	Indicates positive of leptospiral DNA
4	147	Negative	Negative			Negative	Indicates negative of leptospiral DNA
5	148	Negative	Negative
6	149	Positive	Negative
7	150	Negative	Negative
8	152	Negative	Negative
9	154	Positive	Positive
10	155	Positive	Positive
11	156	Positive	Positive
12	158	Negative	Negative
13	162	Positive	Negative
14	164	Positive	Negative
15	166	Negative	Negative
16	167	Negative	Negative
17	169	Positive	Positive
18	170	Negative	Negative
19	171	Negative	Negative
20	172	Negative	Negative
21	173	Negative	Negative
22	174	Negative	Negative
23	175	Negative	Negative
24	176	Positive	Positive
25	177	Negative	Negative
26	178	Negative	Negative
27	179	Negative	Negative
28	188	Negative	Negative
29	189	Negative	Negative
30	190	Negative	Negative
31	191	Negative	Negative
32	192	Negative	Negative
33	193	Negative	Negative
34	196	Negative	Negative
35	212	Negative	Negative
36	244	Positive	Negative
37	245	Negative	Negative
38	252	Negative	Negative
39	253	Positive	Positive
40	254	Positive	Positive
41	255	Negative	Negative
42	256	Negative	Negative
43	257	Positive	Negative
44	258	Positive	Negative
45	260	Negative	Negative
46	261	Positive	Positive
47	262	Negative	Negative
48	263	Positive	Positive
49	264	Negative	Negative
50	265	Negative	Negative
51	268	Negative	Negative
52	413	Positive	Negative
53	414	Positive	Negative
54	415	Positive	Positive
55	421	Positive	Positive
56	422	Positive	Positive
57	426	Negative	Negative
58	435	Negative	Negative
59	436	Negative	Negative
60	438	Negative	Negative
61	439	Negative	Negative
62	440	Negative	Negative
63	441	Negative	Negative
64	442	Positive	Negative
65	443	Negative	Negative
66	444	Negative	Negative
67	445	Positive	Negative
68	446	Negative	Negative
69	447	Positive	Positive
70	448	Positive	Positive
71	449	Negative	Negative
72	450	Negative	Negative
73	451	Negative	Negative
74	452	Negative	Negative
75	453	Positive	Negative
76	454	Positive	Positive
77	455	Positive	Negative
78	456	Negative	Negative
79	457	Negative	Negative
80	458	Negative	Negative
81	459	Negative	Negative
82	460	Positive	Positive
83	461	Positive	Positive
84	462	Negative	Negative
85	463	Negative	Negative
86	464	Negative	Negative
87	465	Positive	Positive
88	475	Positive	Positive
Total Positive		31	19
Total Negative		57	69
Total Samples		88	88
2) Rat kidney sample from high risk area
No	Sample ID	LAMP	PCR
1	PBS- 1	Positive	Negative
2	PBS- 2	Positive	Negative
3	PBS- 3	Positive	Negative			Positive	Indicates positive of leptospiral DNA
4	PBS- 4	Positive	Positive			Negative	Indicates negative of leptospiral DNA
5	PBS- 5	Positive	Negative
6	PBS- 6	Positive	Positive
7	PBS- 7	Positive	Positive
8	PBS- 8	Positive	Positive
9	PBS- 9	Negative	Negative
10	PBS- 10	Negative	Negative
11	PBS- 11	Negative	Negative
12	PBS- 12	Positive	Negative
13	PBS- 13	Negative	Negative
14	PBS- 14	Negative	Negative
15	PBS- 15	Positive	Positive
16	PBS- 16	Negative	Negative
17	PBS- 17	Negative	Negative
18	PBS- 18	Negative	Negative
19	PBS- 19	Negative	Negative
20	PBS- 20	Positive	Negative
21	PBS- 21	Positive	Negative
22	PBS- 22	Negative	Negative
23	PBS- 23	Negative	Negative
24	PBS- 24	Negative	Negative
25	PBS- 25	Negative	Negative
26	PBS- 26	Negative	Negative
27	PBS- 27	Positive	Negative
28	PBS- 28	Positive	Negative
29	PBS- 29	Negative	Negative
30	PBS- 30	Negative	Negative
31	PBS- 31	Negative	Negative
32	PBB - 1	Negative	Negative
33	PBB - 2	Positive	Negative
34	PBB - 3	Positive	Negative
35	PBB - 4	Negative	Negative
36	PBB - 5	Positive	Positive
37	PBB - 6	Negative	Negative
38	PBB - 7	Negative	Negative
39	PBB - 8	Negative	Negative
40	PBB - 9	Negative	Negative
41	PBB - 10	Negative	Negative
42	PBB - 11	Negative	Negative
43	PBB - 12	Positive	Negative
44	PBB - 13	Negative	Negative
45	PBB - 14	Negative	Negative
46	PBB - 15	Negative	Negative
47	PBB - 16	Positive	Positive
48	PBB - 17	Negative	Negative
49	PBB - 18	Positive	Negative
50	PBB - 19	Positive	Negative
51	PBB - 20	Positive	Negative
52	PBB - 21	Positive	Negative
53	PBB - 22	Negative	Negative
54	PBB - 23	Negative	Negative
55	PBB - 24	Negative	Negative
56	PBB - 25	Positive	Positive
57	PBB - 26	Negative	Negative
58	PBB - 27	Negative	Negative
59	PBB - 28	Negative	Negative
60	PBB - 29	Negative	Negative
61	PBB - 30	Negative	Negative
62	PBB - 31	Positive	Positive
Total Positive		25	9
Total Negative		37	53
Total Samples		62	62
