# Supplementary material for: A versatile isothermal amplification assay for the detection of leptospires from various sample types
Source: PeerJ journal article supplement (doi:10.7717/peerj.12850), 2022-03-10
Supplement: Supplemental_Data__Figure_S7.pdf [file Supplemental_Data__Figure_S7.pdf]

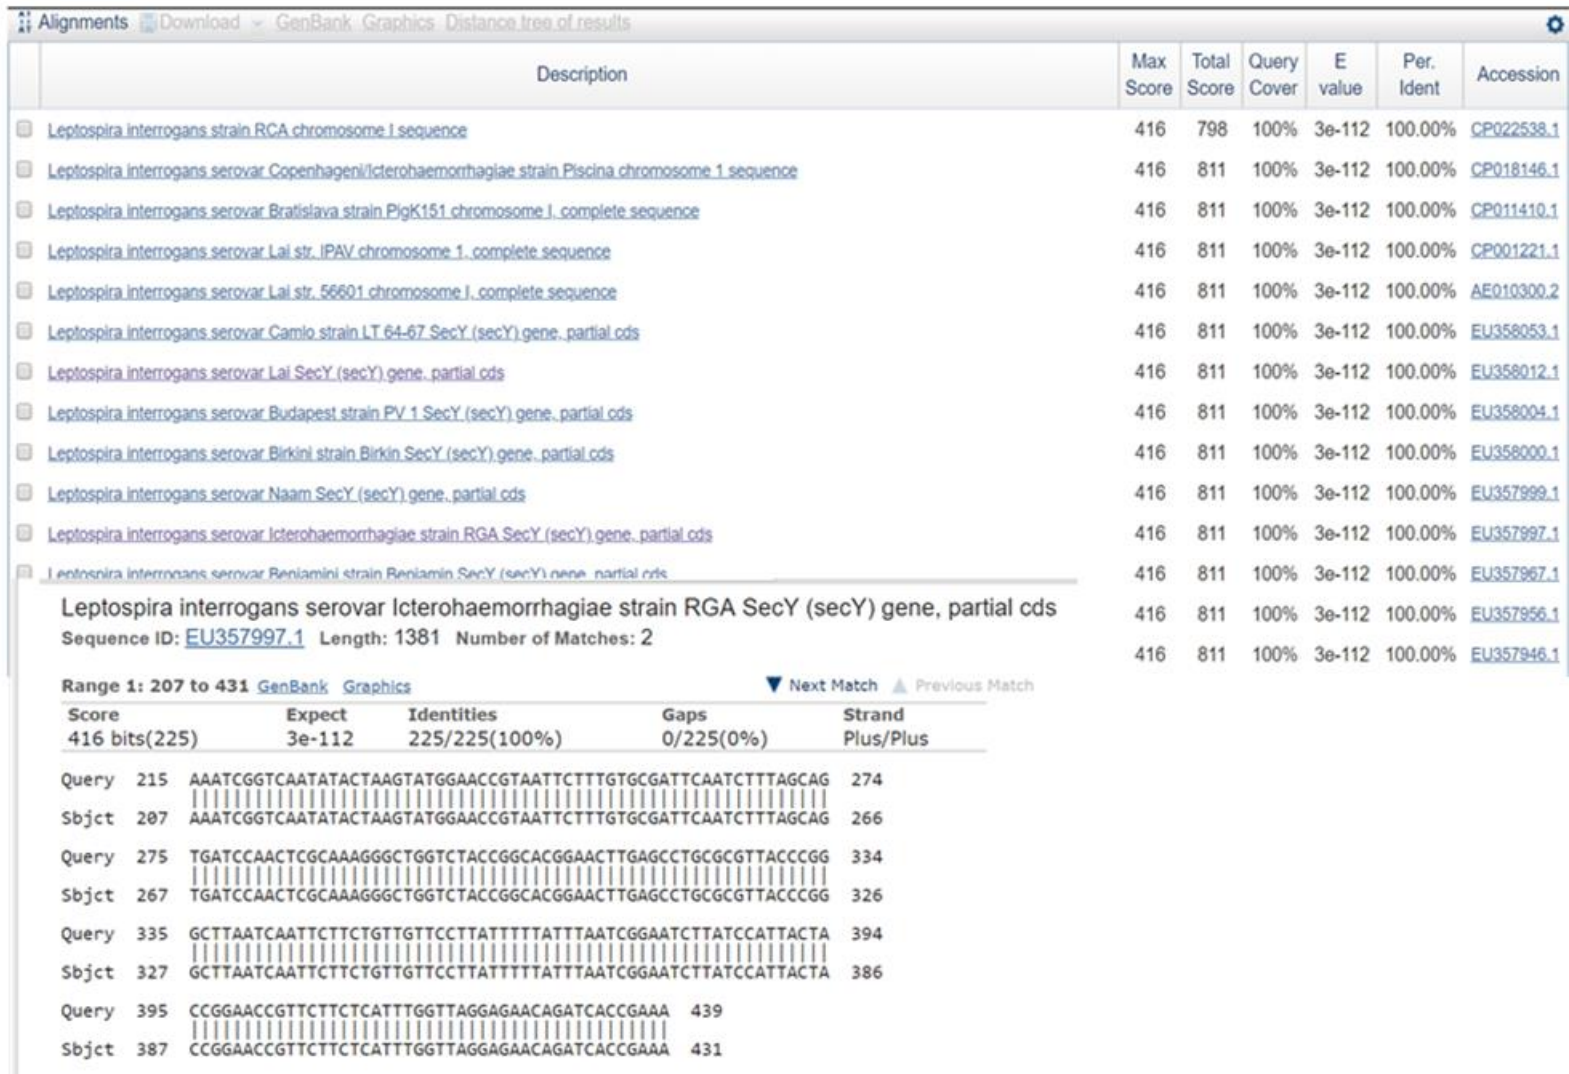

**Figure S7.** Sequencing and BLAST analysis of PCR reaction products from rat kidney samples (Sample 454).
