# Supplementary material for: A versatile isothermal amplification assay for the detection of leptospires from various sample types
Source: PeerJ journal article supplement (doi:10.7717/peerj.12850), 2022-03-10
Supplement: Supplemental_Data_Figure_S3.pdf [file Supplemental_Data_Figure_S3.pdf]

**Sequences producing significant alignments** Download New Select columns Show 10 ?

select all 10 sequences selected [GenBank](#) [Graphics](#) [Distance tree of results](#) New [MSA Viewer](#)

|                                     | Description                                                                                                   | Scientific Name                                      | Max Score | Total Score | Query Cover | E value | Per. Ident | Acc. Len | Accession                  |
|-------------------------------------|---------------------------------------------------------------------------------------------------------------|------------------------------------------------------|-----------|-------------|-------------|---------|------------|----------|----------------------------|
| <input checked="" type="checkbox"/> | <a href="#">Leptospira interrogans serovar Canicola strain 611 chromosome 1, complete sequence</a>            | <a href="#">Leptospira interrogans serovar C...</a>  | 510       | 510         | 100%        | 2e-143  | 100.00%    | 4255595  | <a href="#">CP044513.1</a> |
| <input checked="" type="checkbox"/> | <a href="#">Leptospira interrogans serovar Canicola strain LJ178 chromosome 1, complete sequence</a>          | <a href="#">Leptospira interrogans serovar C...</a>  | 510       | 510         | 100%        | 2e-143  | 100.00%    | 4259066  | <a href="#">CP044509.1</a> |
| <input checked="" type="checkbox"/> | <a href="#">Leptospira interrogans serovar Canicola strain 114 chromosome 1 sequence</a>                      | <a href="#">Leptospira interrogans serovar C...</a>  | 510       | 510         | 100%        | 2e-143  | 100.00%    | 4218946  | <a href="#">CP022883.1</a> |
| <input checked="" type="checkbox"/> | <a href="#">Leptospira interrogans serovar Linhai str. 56609 chromosome 1, complete sequence</a>              | <a href="#">Leptospira interrogans serovar Lj...</a> | 510       | 510         | 100%        | 2e-143  | 100.00%    | 4331770  | <a href="#">CP006723.1</a> |
| <input checked="" type="checkbox"/> | <a href="#">Leptospira interrogans serovar Gem strain Simon secY gene, partial sequence</a>                   | <a href="#">Leptospira interrogans serovar G...</a>  | 510       | 510         | 100%        | 2e-143  | 100.00%    | 1408     | <a href="#">EU358039.1</a> |
| <input checked="" type="checkbox"/> | <a href="#">Leptospira interrogans serovar Pomona strain LT 1026 SecY (secY) gene, partial cds</a>            | <a href="#">Leptospira interrogans serovar P...</a>  | 510       | 510         | 100%        | 2e-143  | 100.00%    | 1375     | <a href="#">EU358017.1</a> |
| <input checked="" type="checkbox"/> | <a href="#">Leptospira interrogans serovar Monjakov SecY (secY) gene, partial cds</a>                         | <a href="#">Leptospira interrogans serovar M...</a>  | 510       | 510         | 100%        | 2e-143  | 100.00%    | 1386     | <a href="#">EU358014.1</a> |
| <input checked="" type="checkbox"/> | <a href="#">Leptospira interrogans serovar Pomona SecY (secY) gene, partial cds</a>                           | <a href="#">Leptospira interrogans serovar P...</a>  | 510       | 510         | 100%        | 2e-143  | 100.00%    | 1382     | <a href="#">EU358013.1</a> |
| <input checked="" type="checkbox"/> | <a href="#">Leptospira interrogans serovar Medanensis strain Hond HC SecY (secY) gene, partial cds</a>        | <a href="#">Leptospira interrogans serovar M...</a>  | 510       | 510         | 100%        | 2e-143  | 100.00%    | 1386     | <a href="#">EU357984.1</a> |
| <input checked="" type="checkbox"/> | <a href="#">Leptospira interrogans serovar Bratislava strain Jez Bratislava SecY (secY) gene, partial cds</a> | <a href="#">Leptospira interrogans serovar Br...</a> | 510       | 510         | 100%        | 2e-143  | 100.00%    | 1386     | <a href="#">EU357939.1</a> |

[Download](#) [GenBank](#) [Graphics](#)

**Leptospira interrogans serovar Gem strain Simon secY gene, partial sequence**  
 Sequence ID: [EU358039.1](#) Length: 1408 Number of Matches: 1

Range 1: 163 to 438 [GenBank](#) [Graphics](#) [Next Match](#) [Previous Match](#)

| Score         | Expect | Identities    | Gaps      | Strand    |
|---------------|--------|---------------|-----------|-----------|
| 510 bits(276) | 2e-143 | 276/276(100%) | 0/276(0%) | Plus/Plus |

```

Query 1  CTTGTTCTGCCCTCaaaaacttcaaaaagaaggagaaggaaggaaaaaaaTTGGT 60
Sbjct 163 CTTGTTCTGCCCTCaaaaacttcaaaaagaaggagaaggaaggaaaaaaaTTGGT 222

Query 61 CAATATACTAAGTATGGAACCGTAATTCTTTGTGCGATTCAATCTTAGCAGTGATCCAA 120
Sbjct 223 CAATATACTAAGTATGGAACCGTAATTCTTTGTGCGATTCAATCTTAGCAGTGATCCAA 282

Query 121 CTCGCAAAGGGCTGGTCTACCGCACGGAACCTGAGCCTGCGCCTTACCCGGGCTTAATC 180
Sbjct 283 CTCGCAAAGGGCTGGTCTACCGCACGGAACCTGAGCCTGCGCCTTACCCGGGCTTAATC 342

Query 181 AATTCTTCTGTTGTTTCCTTATTTTATTTAATCGGAATCTTATCCATTACTACCGGAACC 240
Sbjct 343 AATTCTTCTGTTGTTTCCTTATTTTATTTAATCGGAATCTTATCCATTACTACCGGAACC 402

Query 241 GTTCTTCTCATTGGTTAGGAGAACAGATCACCGAA 276
Sbjct 403 GTTCTTCTCATTGGTTAGGAGAACAGATCACCGAA 438

```

**Figure S3.** Sequencing and BLAST analysis of PCR reaction products from clinical blood samples (Sample 058).
